# Supplementary material for: Cryogels from Pt/γ-Fe2O3 and Pd/γ-Fe2O3 NPs as Promising Electrocatalysts for Ethanol Oxidation Reaction
Source: MDPI journal article supplement (doi:10.3390/catal13071074), 2023-07-06
Supplement: s1 [file s1]

## SUPPLEMENTARY FIGURES

# Cryogels from Pt/ $\gamma$ -Fe<sub>2</sub>O<sub>3</sub> and Pd/ $\gamma$ -Fe<sub>2</sub>O<sub>3</sub> NPs as Promising Electrocatalysts for Ethanol Oxidation Reaction

Hadir Borg <sup>1,2,3</sup>, Irene Morales <sup>1,2</sup>, Daniel Kranz <sup>1,4</sup>, Nadja C. Bigall <sup>1,2,4</sup> and Dirk Dorfs <sup>1,2,4,\*</sup>

- <sup>1</sup> Institute of Physical Chemistry and Electrochemistry, Leibniz Universität Hannover, 30167 Hannover, Germany; hadir.borg@pci.uni-hannover.de (H.B.); irene.morales@pci.uni-hannover.de (I.M.); daniel.kranz@pci.uni-hannover.de (D.K.); nadja.bigall@pci.uni-hannover.de (N.C.B.)
- <sup>2</sup> Cluster of Excellence PhoenixD (Photonics, Optics and Engineering—Innovation Across Disciplines), Leibniz Universität Hannover, 30167 Hanover, Germany
- <sup>3</sup> Department of Pharmaceutical Chemistry, Faculty of Pharmacy, Delta University for Science and Technology, Gamasa 35712, Egypt
- <sup>4</sup> Laboratory for Nano and Quantum Engineering, Leibniz Universität Hannover, 30167 Hannover, Germany
- \* Correspondence: dirk.dorfs@pci.uni-hannover.de

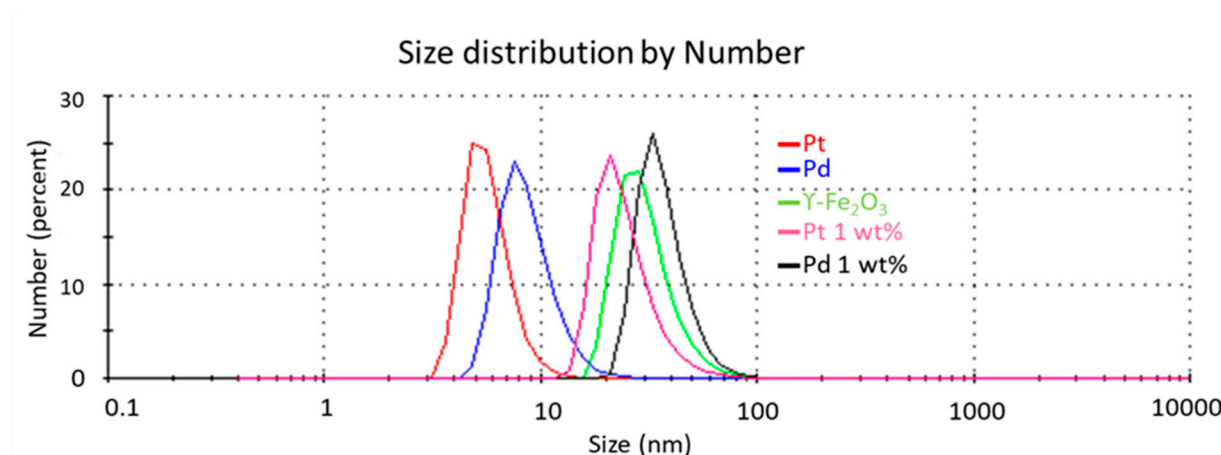

**Figure S1.** DLS measurement (number distribution) of the Pt, Pd and  $\gamma$ -Fe<sub>2</sub>O<sub>3</sub> NPs and mixed colloids (1 wt% Pt/  $\gamma$ -Fe<sub>2</sub>O<sub>3</sub> and 1 wt% Pd/  $\gamma$ -Fe<sub>2</sub>O<sub>3</sub> NPs).

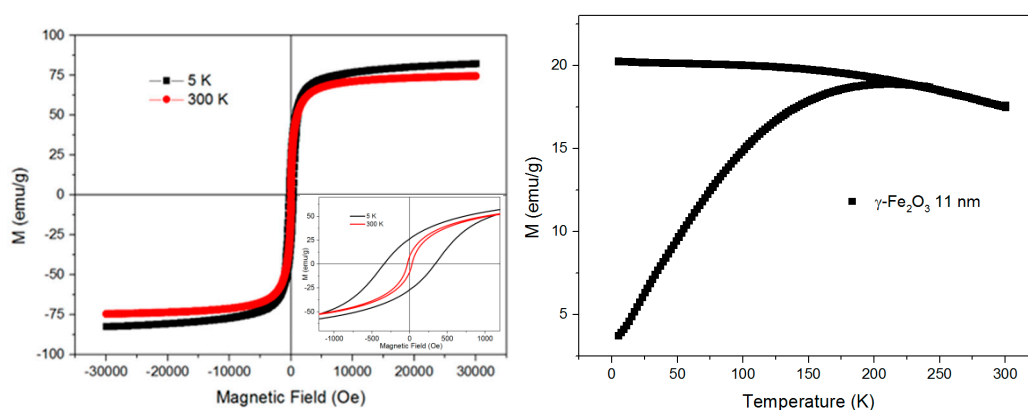

**Figure S2.** Hysteresis cycles at 5 and 300 K (A) and ZFC-FC measured at 100 Oe for the 11 nm  $\gamma$ -Fe<sub>2</sub>O<sub>3</sub> NPs (B).

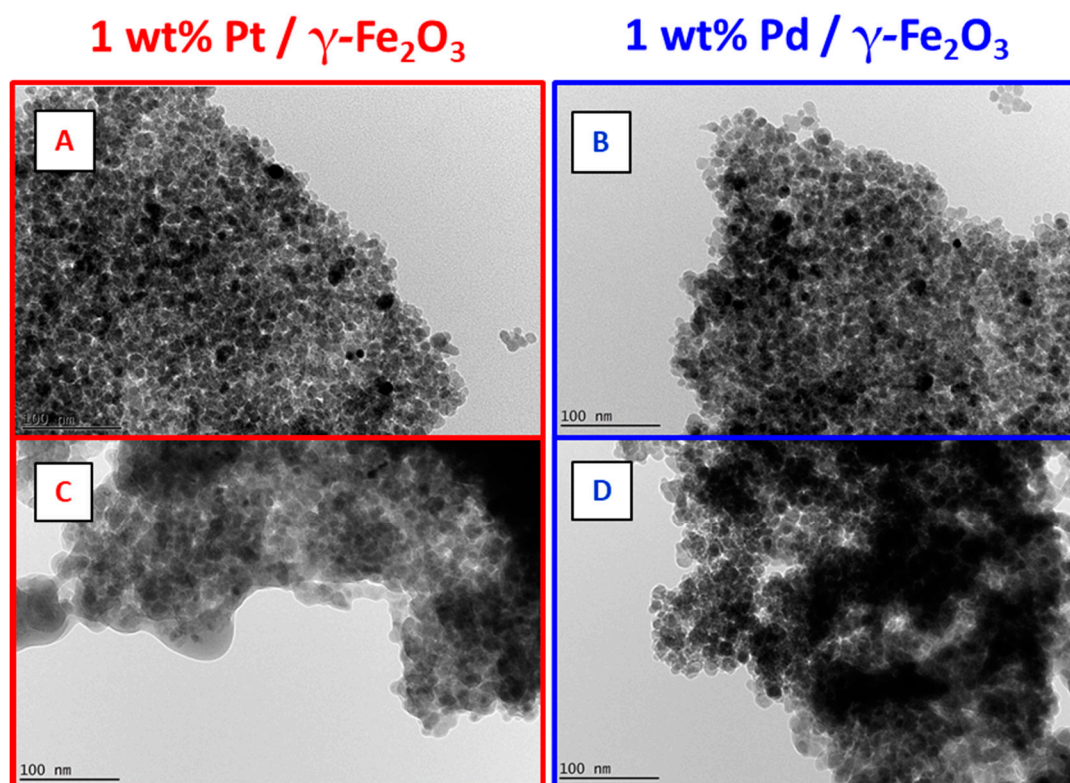

**Figure S3.** TEM images of (A) cryoaerogel of 1 wt% Pt/  $\gamma$ -Fe<sub>2</sub>O<sub>3</sub> before CV measurements, (B) cryoaerogel of 1 wt% Pd/  $\gamma$ -Fe<sub>2</sub>O<sub>3</sub> before CV measurements, (C) ambient condition dried cryohydrogels of 1 wt% Pt/  $\gamma$ -Fe<sub>2</sub>O<sub>3</sub> after CV measurements and (D) ambient condition dried cryohydrogels of 1 wt% Pd/  $\gamma$ -Fe<sub>2</sub>O<sub>3</sub> after CV measurements.

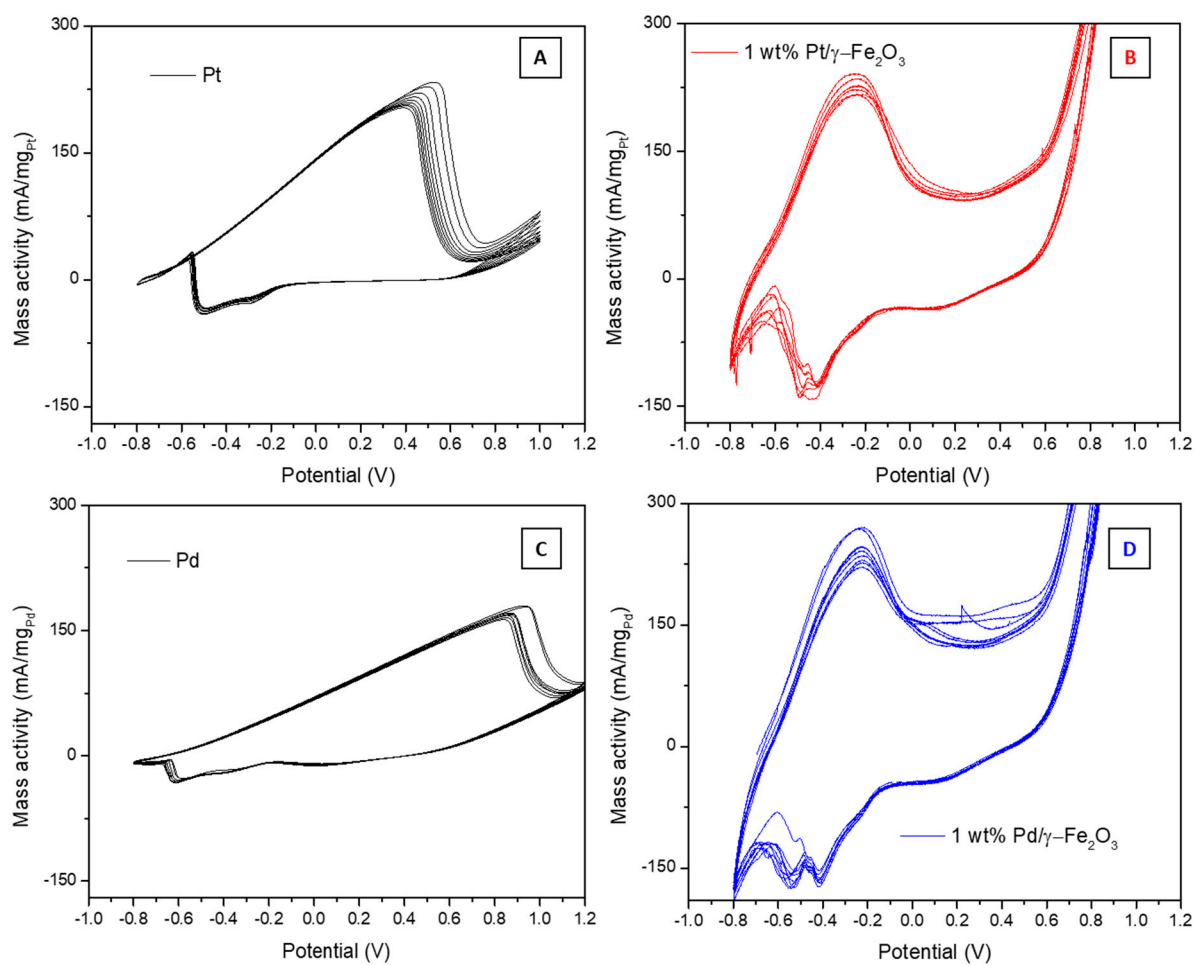

**Figure S4.** Cyclic voltammetry of the cryohydrogel thin films from (A) Pt, (B) 1 wt% Pt/ $\gamma$ -Fe<sub>2</sub>O<sub>3</sub> NPs, (C) Pd and (D) 1 wt% Pd/ $\gamma$ -Fe<sub>2</sub>O<sub>3</sub> NPs. All measurements have been done in 0.25 M Ethanol/ 1 M KOH at a scan rate of 50 mV/s.
